# Supplementary material for: Enzyme-driven i-motif DNA folding for logic operations and fluorescent biosensing
Source: Royal Society of Chemistry journal article supplement (doi:10.1039/c4cc09905b), 2015-01-01
Supplement: c4cc09905b1.pdf [file c4cc09905b1.pdf]

*Electronic Supplementary Information*

**Enzyme-driven i-motif DNA folding for logic operations and fluorescent biosensing**

Ming Wang, Guanxin Zhang, Deqing Zhang\*

Beijing National Laboratory for Molecular Sciences, Organic Solids Laboratory, Institute of Chemistry, Chinese Academy of Sciences, Beijing 100190, China.

E-mail: [dqzhang@iccas.ac.cn](mailto:dqzhang@iccas.ac.cn)

**Materials and Methods**

Dual-labeled DNA was synthesized by Takara (Dalian, China). All other chemicals and enzymes used in this study were purchased from Aldrich-Sigma (St. Louis, MO, USA). The fluorescence spectra were recorded using Hitachi F-4500 spectrophotometer at room temperature.

**pH-dependent RG emission of dual-labeled DNA.** 20 nM of dual-labeled DNA solution was prepared by adding stocked DNA solution to 1.0 mM Tris buffer (containing 0.1 M NaCl) with pH ranging from 5.1 to 7.8. The RG emission spectra were measured with an excitation wavelength at 503 nm.

**“NOR” logic gate fabrication** To develop a logic gate with “NOR” function, to a mixed solution of DNA (20 nM in 1.0mM Tris buffer, pH = 6.8), acetylcholine (1.0mM), and glucose (25 mM) was added AChE (50 mU), or GOx (40 U), or AChE and GOx simultaneously. The RG emission spectra were measured after incubation for 30 min. at 37 °C, the RG emission intensity was then compared and gated to the emission of solution without enzyme addition.

**“NAND” logic gate fabrication** The “NAND” logic gate was developed by adding INV (100 U) and GOx (40 U) to a mixed solution of DNA (20 nM in 1.0mM Tris buffer, pH = 6.8) and sucrose (25 mM). The RG emission intensity was measured and compared to that without enzyme addition or with only one enzyme.

**AChE activity assay and inhibitor identification** To demonstrate the use of the “NOR” DNA logic gate for enzyme activity assay, a mixture of DNA (20 nM) and acetylcholine (1.0 mM) in 1.0 mM Tris buffer (pH = 6.8) was incubated with varied amounts of AChE (10 mU, 25 mU, 50 mU, and 100 mU) for 15 min. at room temperature, the RG emission intensity at 530 nm was monitored and compared to a solution without AChE addition. AChE inhibitor identification using the DNA logic gate was performed by incubating a mixed solution of DNA (20 nM), acetylcholine (1.0 mM), and AChE (50 mU) in the absence and presence of 10  $\mu$ M neostigmine. The solution emission was then monitored and compared as described above. To determine the IC<sub>50</sub> of neostigmine against AChE, the solution of DNA (20 nM), acetylcholine (1.0 mM), and AChE (50 mU) was incubated with different concentration of neostigmine, AChE activity was assayed and compared based on the RG emission change in the presence of different concentration of neostigmine.

**Glucose sensing using “NOR” logic gate.** To develop a fluorometric glucose sensor, a mixed solution of DNA (20 nM) and GOx (40 U) was incubated with varied concentrations of glucose for 30 min. RG fluorescence intensity at 530 nm (F) was recorded and normalized to that without glucose (F<sub>0</sub>). To demonstrate a high selectivity of glucose sensing using the DNA logic gate, the sensing solution described above was incubated with 750  $\mu$ M of galactose, mannose, fructose, or maltose.

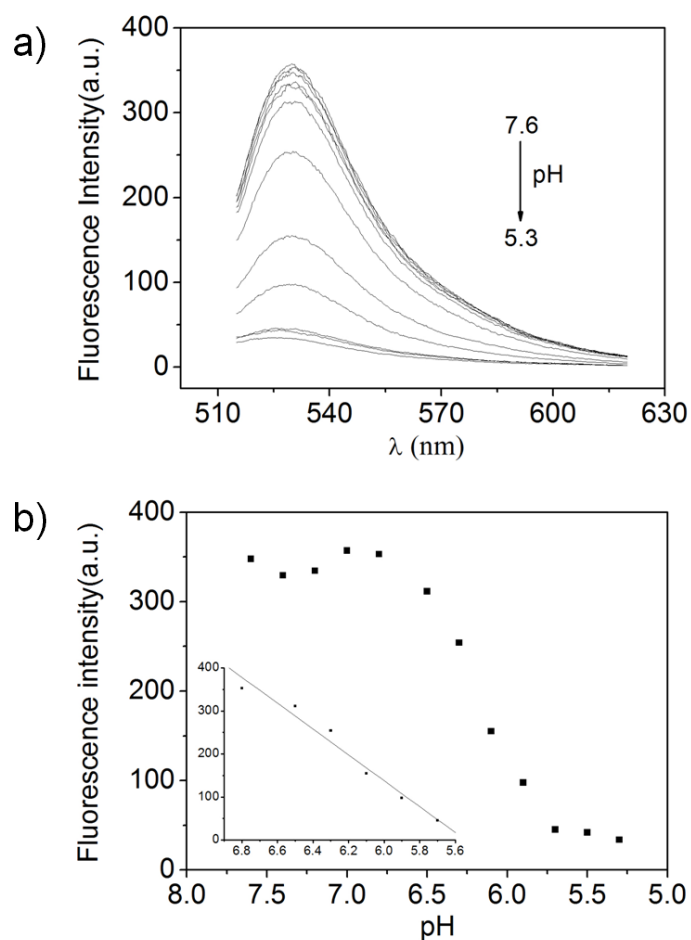

**Fig. S1** Fluorescence spectra (a) and emission intensity at 530 nm (b) of dual-labeled DNA (20 nM) in Tris buffered solutions (1.0 mM) containing 0.1 M NaCl with varied pH value. The fluorescence was measured with an excitation wavelength at 503 nm.

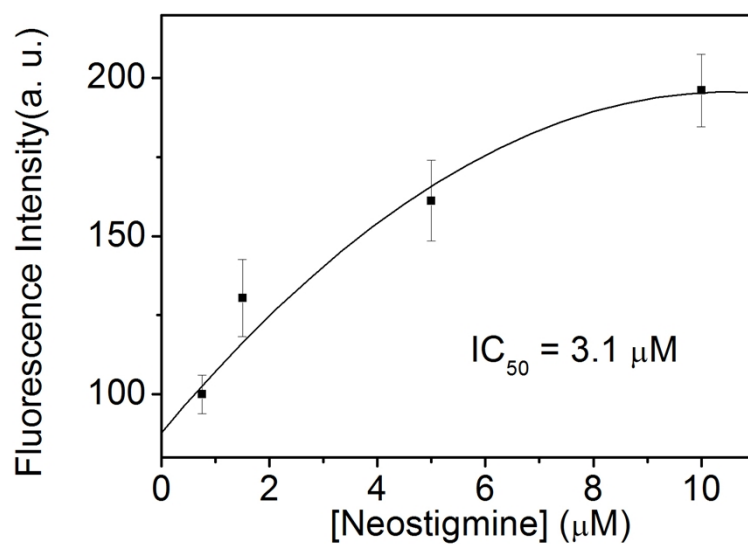

**Fig. S2** The effect of neostigmine concentration on AChE activity. A mixed solution of DNA (20 nM), acetylcholine (1.0 mM), and AChE (50 mU) was incubated with indicated concentration of neostigmine, RG emission intensity was monitored at 530 nm.

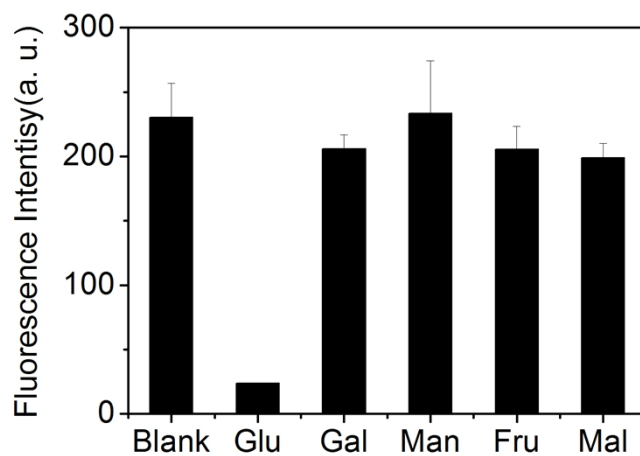

**Fig.S3** Selective glucose sensing using the “NOR” DNA logic gate. A mixed solution of DNA (20 nM) and GOx (40 U) was incubated with 750  $\mu$ M of different saccharides as indicated, followed by RG emission measurement at 530 nm.
